# Supplementary material for: Asymmetric conformations of cleaved HIV-1 envelope glycoprotein trimers in styrene-maleic acid lipid nanoparticles
Source: PubMed Central journal article supplement (PMC10195785; doi:10.1038/s42003-023-04916-w), 2023-05-18
Supplement: 42003_2023_4916_MOESM3_ESM.pdf [file 42003_2023_4916_MOESM3_ESM.pdf]

## Description of Additional Supplementary Files

**File name:** Supplementary Data

**Description:** The source data behind the graphs in the paper.
